# Supplementary material
Source: PubMed Central journal article supplement (PMC1783137)

Non-MDS Cytopenia

MDS

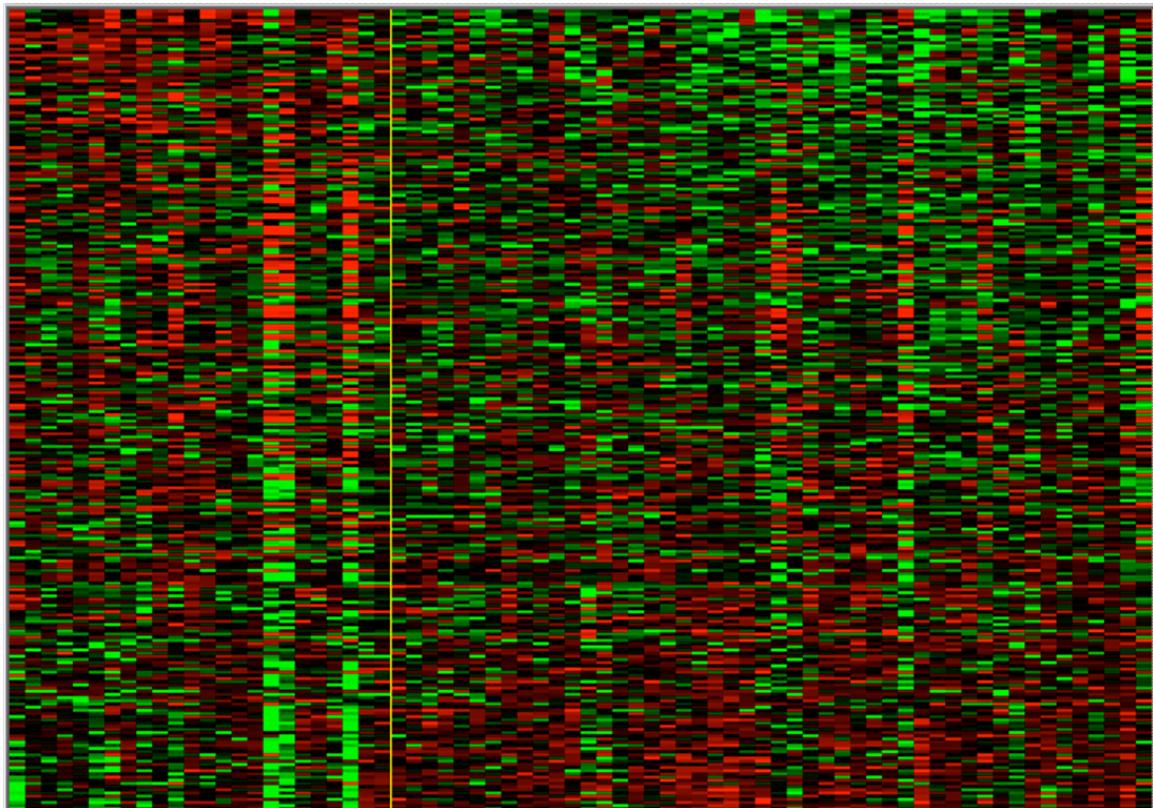

Supplement: pnas_0610330104_1.pdf [file pnas_0610330104_1.pdf]

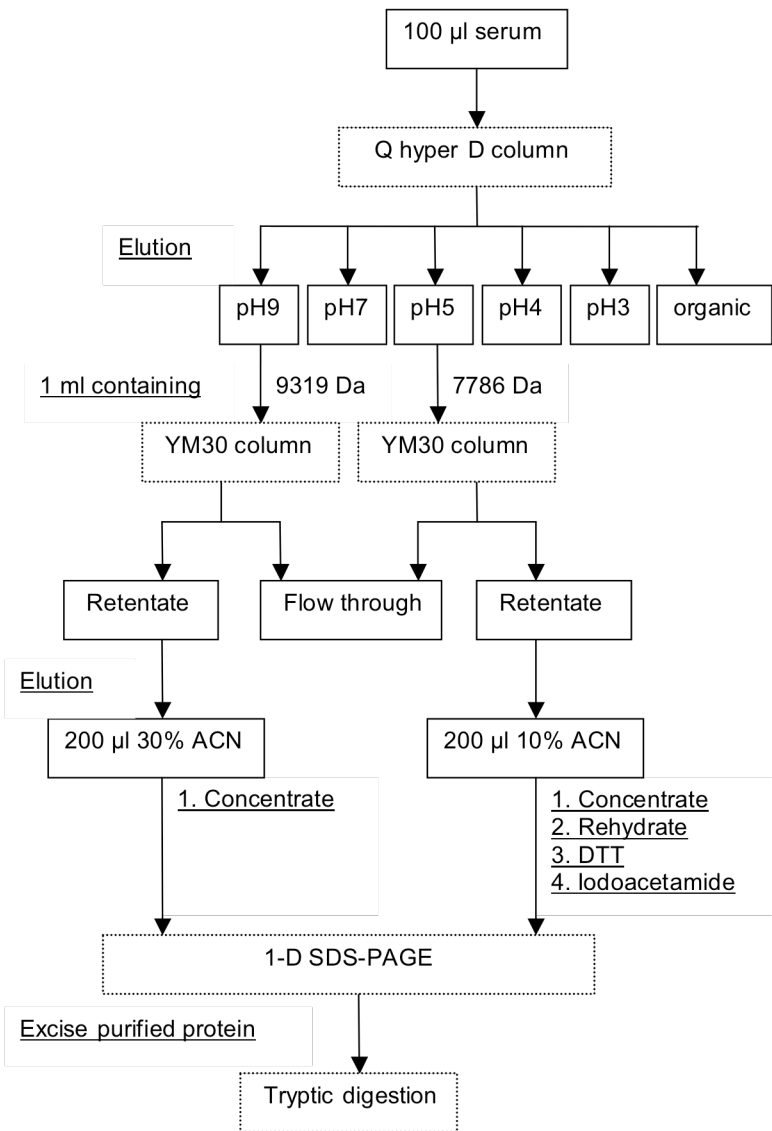

Supplement: pnas_0610330104_2.pdf [file pnas_0610330104_2.pdf]
